# Supplementary material for: Oncogenic Alterations in Histologically Negative Lymph Nodes Are Associated with Prognosis of Patients with Stage I Lung Adenocarcinoma
Source: MDPI journal article supplement (doi:10.3390/cancers14030824), 2022-02-06

### Supplementary Materials:

Supplementary Figure S1 The expression of AE1/AE3 and BerEP4 in primary cancer tissue and corresponding lymph node with molecular alteration. Primary cancer tissue (HE, A), showed strong positive staining for AE1/AE3 (B) and Ber-EP4 (C). Lymph node with molecular alteration (HE, D) showed negative staining for AE1/AE3 (E) and Ber-EP4 (F). Original magnification were 200 times.

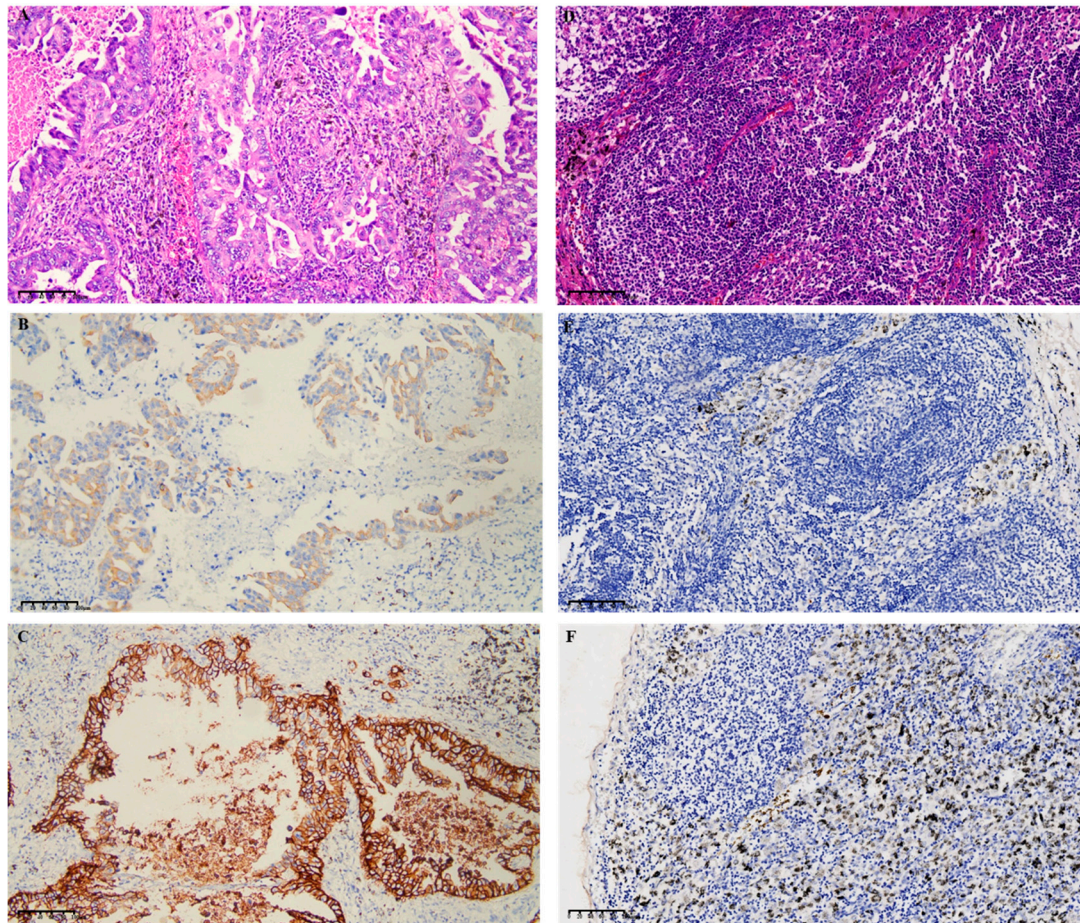

Supplement: s1 [file s1]
